# Supplementary material for: Cholinergic Receptor Nicotinic Alpha 5 (CHRNA5) RNAi is associated with cell cycle inhibition, apoptosis, DNA damage response and drug sensitivity in breast cancer
Source: PubMed Central journal article supplement (PMC6292578; doi:10.1371/journal.pone.0208982), 2018-12-13
Supplement: pone.0208982.s001.pdf [file pone.0208982.s001.pdf]

**S1 Table. Primer pairs used in this study for gene expression analysis by RT-qPCR**

| <b>Name</b>  | <b>Primer sequence (5'-3')</b>                               | <b>Size of amplicon (bp)</b> | <b>Amplification efficiency</b> |
|--------------|--------------------------------------------------------------|------------------------------|---------------------------------|
| CHRNA5_v1    | F: AGATGGAACCCTGATGACTATGGT<br>R: AAACGTCCATCTGCATTATCAAAC   | 104                          | 1.87                            |
| CHRNA5_v2    | F: GGAAACTGAGAGTGGTAGTGGA<br>R: CTTCAACAACCTCACGGACA         | 122                          | 1.95                            |
| CHRNA5_v3    | F: CATCAGGTGTTGAAGATTGGAAAT<br>R: AAAAAGCCCAAGAGATCCAACAAT   | 101                          | 1.92                            |
| CHRNA5_iso2* | F: TGGAGAATGGGAGATTGTGAGTGCA<br>R: CCAATCTTCAACAACCAGCAACAGC | 78                           | 1.97                            |
| CHRNA5_iso3* | F: TGGAGAATGGGAGATTGTGAGTGCA<br>R: CCAATCTTCAACAACGGATACCAGC | 84                           | 1.96                            |
| SDHA         | F: TGGGAACAAGAGGGCATCTG<br>R: CCACCACTGCATCAAATTCATG         | 86                           | 2.01                            |
| MAP1B        | F: GTTGGAAGGAAAGGCTCAGT<br>R: CTTGCTGTTTCTCATGGGTC           | 110                          | 1.81                            |
| CLDN1        | F: CTGTCATTGGGGTTCGATA<br>R: CTGGCATTGACTGGGGTCAT            | 118                          | 1.88                            |
| WDHD1        | F: AGCAGCCAAGGACGAGTAA<br>R: CTTCCGGCTTTGGAATCAGAG           | 192                          | 1.95                            |
| ANLN         | F: TAAAGCAGGTGATTGTTCCGG<br>R: GTTCTTCATCAACACAGCAG          | 180                          | 1.97                            |
| BIRC5        | F: GTTGCGCTTTCTTTCTGTC<br>R: TCTCCGAGTTTCTCAAAT              | 141                          | 1.92                            |
| CDKN1A       | F: GTCACTGTCTTGACCCTTGTC<br>R: CGGCGTTTGGAGTGGTAGAA          | 129                          | 1.82                            |
| GPNMB        | F: TGCTGACTGTGAGACGAACC<br>R: ACACCAAGAGGGAGATCACAG          | 204                          | 1.92                            |
| GJA1         | F: TCTGAGTGCCTGAACTTGCC<br>R: CCCTCCAGCAGTTGAGTAGG           | 171                          | 2                               |
| GADD45A      | F: TCTCGGCTGGAGAGCAGAAGAC<br>R: AGCTTGCCGCTTCGTACAC          | 121                          | 1.96                            |
| BAX          | F: GGGTTGTCGCCCTTTTCTAC<br>R: CTGGAGACAGGGACATCAGT           | 198                          | 2.09                            |
| BCL2         | F: TGAAGTGGGGGAGGATTGTG<br>R: CGTACAGTTCCACAAAGGCA           | 183                          | 2.04                            |
| FAS          | F: AATAAACTGCACCCGACCC<br>R: AGAAGACAAAGCCACCCCAA            | 192                          | 2.06                            |
| CCND1        | F: CTGCGAAGTGGAACCATCC<br>R: GCACTTCTGTTCTCGCAGA             | 199                          | 1.97                            |
| CCNE2        | F: GTAGCTGGTCTGGCGAGGTTT<br>R: GGGCTGCTGCTTAGCTTGTA          | 83                           | 2.08                            |
| CHEK1        | F: TGGTCACAGGAGAGAAGGCA<br>R: CAGATAAACCAACCCTGCCA           | 151                          | 1.72                            |
