# Supplementary material for: Cholinergic Receptor Nicotinic Alpha 5 (CHRNA5) RNAi is associated with cell cycle inhibition, apoptosis, DNA damage response and drug sensitivity in breast cancer
Source: PubMed Central journal article supplement (PMC6292578; doi:10.1371/journal.pone.0208982), 2018-12-13
Supplement: pone.0208982.s002.pdf [file pone.0208982.s002.pdf]

**S2 Table.** KEGG annotation of shared CHRNA5 siRNA-1 and CCLE expression profile in unfiltered/filtered (expression > 5; described in results section) correlation analysis (p values < 0.05). NA represents term that was not found significant.

| <b>CCLE correlations based on unfiltered data / filtered data (expression&gt;5)</b>     |        |                     |                     |
|-----------------------------------------------------------------------------------------|--------|---------------------|---------------------|
| <b>Upregulated by siRNA-1 and positively correlated with CHRNA5 in CCLE breast data</b> |        |                     |                     |
| Term                                                                                    | Count  | PValue              | Benjamini           |
| hsa04530:Tight junction                                                                 | 11/6   | 1.59E-04 / 3.09E-02 | 1.84E-02 / 7.85E-01 |
| hsa04012:ErbB signaling pathway                                                         | 6 / NA | 2.18E-02 / NA       | 7.24E-01/ NA        |
| hsa04514:Cell adhesion molecules (CAMs)                                                 | 7 / NA | 3.46E-02 / NA       | 7.47 E-01 / NA      |
| hsa04660:T cell receptor signaling pathway                                              | 6 / NA | 4.87E-02/ NA        | 7.68E-01 / NA       |
| hsa03010:Ribosome                                                                       | NA / 5 | NA / 2.71E-02       | 0 / 9.32E-01        |
| <b>Downregulated by siRNA-1 and negative correlated with CHRNA5 in CCLE breast data</b> |        |                     |                     |
| hsa04144:Endocytosis                                                                    | 7 / 7  | 2.73E-02 / 2.37E-02 | 8.94E-01 / 8.27E-01 |
| hsa04810:Regulation of actin cytoskeleton                                               | NA / 7 | NA / 4.57E-02       | NA / 8.19E-01       |
| <b>Upregulated by siRNA-1 and negatively correlated with CHRNA5 in CCLE breast data</b> |        |                     |                     |
| hsa05219:Bladder cancer                                                                 | 5 / 5  | 4.61E-03 / 5.02E-03 | 4.09E-01 / 2.34E-01 |

|                                                                                           |         |                     |                     |
|-------------------------------------------------------------------------------------------|---------|---------------------|---------------------|
| hsa00520:Amino sugar and nucleotide sugar metabolism                                      | 5 / 4   | 5.45E-03 / 3.65E-02 | 2.68E-01 / 3.89E-01 |
| hsa04310:Wnt signaling pathway                                                            | 8 / 9   | 1.11E-02 / 3.49E-03 | 3.47E-01 / 3.10E-01 |
| hsa04510:Focal adhesion                                                                   | 9 / 9   | 1.61E-02 / 1.84E-02 | 3.70E-01 / 3.88E-01 |
| hsa00500:Starch and sucrose metabolism                                                    | 4 / NA  | 3.05E-02 / NA       | 5.06E-01 / NA       |
| hsa04142:Lysosome                                                                         | 6 / NA  | 4.15E-02 / NA       | 5.53E-01 / NA       |
| hsa04350:TGF-beta signaling pathway                                                       | NA / 6  | NA / 1.47E-02       | NA / 4.07E-01       |
| hsa05200:Pathways in cancer                                                               | NA / 12 | NA / 1.97E-02       | NA / 3.45E-01       |
| hsa04115:p53 signaling pathway                                                            | NA / 5  | NA / 2.63E-02       | NA / 3.76E-01       |
| hsa04144:Endocytosis                                                                      | NA / 8  | NA / 3.33E-02       | NA / 4.01E-01       |
| hsa00520:Amino sugar and nucleotide sugar metabolism                                      | NA / 4  | NA / 3.65E-02       | NA / 3.89E-01       |
| <b>Downregulated by siRNA-1 and positively correlated with CHRNA5 in CCLE breast data</b> |         |                     |                     |
| hsa03030:DNA replication                                                                  | 24 / 24 | 1.33E-22 / 2.48E-24 | 2.0E-20 / 3.25E-22  |
| hsa04110:Cell cycle                                                                       | 34 / 31 | 6.04E-17 / 2.63E-16 | 8.44E-15 / 1.45E-14 |
| hsa03430:Mismatch repair                                                                  | 13 / 13 | 7.56E-11 / 1.03E-11 | 3.81E-09 / 3.37E-10 |
| hsa03040:Spliceosome                                                                      | 27 / 27 | 7.59E-11 / 1.52E-12 | 2.87E-09 / 6.65E-11 |
| hsa03410:Base excision repair                                                             | 14 / 14 | 2.32E-09 / 2.86E-10 | 7.01E-08 / 7.49E-09 |
| hsa00240:Pyrimidine metabolism                                                            | 21 / 20 | 9.18E-09 / 3.27E-09 | 2.31E-07 / 7.14E-08 |
| hsa03420:Nucleotide excision repair                                                       | 13 / 13 | 4.87E-07 / 7.68E-08 | 1.05E-05 / 1.44E-06 |

|                                                  |         |                     |                     |
|--------------------------------------------------|---------|---------------------|---------------------|
| hsa03440:Homologous recombination                | 10 / 10 | 3.04E-06 / 7.39E-07 | 5.73E-05 / 1.21E-05 |
| hsa00230:Purine metabolism                       | 22 / 19 | 7.35E-06 / 2.89E-05 | 1.23E-04 / 3.79E-04 |
| hsa03018:RNA degradation                         | 12 / 12 | 5.31E-05 / 1.10E-05 | 8.01E-04 / 1.60E-04 |
| hsa04114:Oocyte meiosis                          | 16 / 15 | 1.67E-04/9.79E-05   | 2.29E-03/ 1.16E-03  |
| hsa04914:Progesterone-mediated oocyte maturation | 12 / 10 | 2.11E-03/ 6.69E-03  | 2.62E-02/ 7.06E-02  |
| hsa04115:p53 signaling pathway                   | 9 / 8   | 1.36E-02/ 1.75E-02  | 1.47E-01 / 1.63E-01 |
| hsa00900:Terpenoid backbone biosynthesis         | 4 / 4   | 3.07E-02 / 1.97E-02 | 2.85E-01 / 1.70E-01 |
| hsa00670:One carbon pool by folate               | 4 / 4   | 3.65E-02 / 2.36E-02 | 3.12E-01 / 1.88E-01 |
