# Supplementary material for: Cholinergic Receptor Nicotinic Alpha 5 (CHRNA5) RNAi is associated with cell cycle inhibition, apoptosis, DNA damage response and drug sensitivity in breast cancer
Source: PubMed Central journal article supplement (PMC6292578; doi:10.1371/journal.pone.0208982), 2018-12-13
Supplement: pone.0208982.s003.pdf [file pone.0208982.s003.pdf]

**S3 Table. Chromosomal neighbors correlated with CHRNA5 expression in siRNA-1 and CCLE expression profiles.**

| ID           | Gene Name                                                      | Species      |
|--------------|----------------------------------------------------------------|--------------|
| 203755_AT    | BUB1 mitotic checkpoint serine/threonine kinase B(BUB1B)       | Homo sapiens |
| 205733_AT    | Bloom syndrome RecQ like helicase(BLM)                         | Homo sapiens |
| 213007_AT    | Fanconi anemia complementation group I(FANCI)                  | Homo sapiens |
| 1558750_A_AT | OTU deubiquitinase 7A pseudogene(LOC100288637)                 | Homo sapiens |
| 213599_AT    | Opa interacting protein 5(OIP5)                                | Homo sapiens |
| 228252_AT    | PIF1 5'-to-3' DNA helicase(PIF1)                               | Homo sapiens |
| 219258_AT    | TIMELESS interacting protein(TIPIN)                            | Homo sapiens |
| 230021_AT    | TOPBP1 interacting checkpoint and replication regulator(TICRR) | Homo sapiens |
| 239680_AT    | WD repeat domain 76(WDR76)                                     | Homo sapiens |
| 239413_AT    | centrosomal protein 152(CEP152)                                | Homo sapiens |
| 206533_AT    | cholinergic receptor nicotinic alpha 5 subunit(CHRNA5)         | Homo sapiens |
| 202705_AT    | cyclin B2(CCNB2)                                               | Homo sapiens |
| 208955_AT    | deoxyuridine triphosphatase(DUT)                               | Homo sapiens |
| 224779_S_AT  | family with sequence similarity 96 member A(FAM96A)            | Homo sapiens |
| 202070_S_AT  | isocitrate dehydrogenase 3 (NAD(+)) alpha(IDH3A)               | Homo sapiens |
| 204709_S_AT  | kinesin family member 23(KIF23)                                | Homo sapiens |
| 225300_AT    | kinetochore localized astrin/SPAG5 binding protein(KNSTRN)     | Homo sapiens |
| 218039_AT    | nucleolar and spindle associated protein 1(NUSAP1)             | Homo sapiens |
| 218009_S_AT  | protein regulator of cytokinesis 1(PRC1)                       | Homo sapiens |
| 205768_S_AT  | solute carrier family 27 member 2(SLC27A2)                     | Homo sapiens |
| 222606_AT    | zwilch kinetochore protein(ZWILCH)                             | Homo sapiens |
