# Supplementary material for: Cholinergic Receptor Nicotinic Alpha 5 (CHRNA5) RNAi is associated with cell cycle inhibition, apoptosis, DNA damage response and drug sensitivity in breast cancer
Source: PubMed Central journal article supplement (PMC6292578; doi:10.1371/journal.pone.0208982), 2018-12-13
Supplement: pone.0208982.s004.pdf [file pone.0208982.s004.pdf]

**S4 Table : Top 5 KEGG pathways (having BH<0.05) of shared CRHNA5 depleted transcriptome in MCF7 and A549 cell line.**

| <b>Upregulated in both MCF7 and A549</b>             |       |          |           |  |
|------------------------------------------------------|-------|----------|-----------|--|
| Term                                                 | Count | PValue   | Benjamini |  |
| hsa03060:Protein export                              | 10    | 8.22E-06 | 2.16E-03  |  |
| hsa04141:Protein processing in endoplasmic           | 25    | 3.01E-04 | 3.89E-02  |  |
| <b>Downregulated in both MCF7 and A549</b>           |       |          |           |  |
| Term                                                 | Count | PValue   | Benjamini |  |
| hsa03030:DNA replication                             | 28    | 1.51E-21 | 4.07E-19  |  |
| hsa04110:Cell cycle                                  | 51    | 2.03E-21 | 2.73E-19  |  |
| hsa03040:Spliceosome                                 | 49    | 3.03E-18 | 2.73E-16  |  |
| hsa03460:Fanconi anemia pathway                      | 26    | 3.78E-13 | 2.55E-11  |  |
| hsa03440:Homologous recombination                    | 18    | 2.58E-11 | 1.39E-09  |  |
| <b>Upregulated in MCF7 and downregulated in A549</b> |       |          |           |  |
| Term                                                 | Count | PValue   | Benjamini |  |
| hsa05203:Viral carcinogenesis                        | 30    | 6.13E-07 | 1.57E-04  |  |
| hsa05161:Hepatitis B                                 | 24    | 1.25E-06 | 1.60E-04  |  |
| hsa05160:Hepatitis C                                 | 21    | 1.43E-05 | 1.22E-03  |  |
| hsa05142:Chagas disease (American trypan             | 18    | 2.08E-05 | 1.33E-03  |  |
| hsa04917:Prolactin signaling pathway                 | 14    | 5.86E-05 | 2.99E-03  |  |
| <b>Downregulated in MCF7 and Upregulated in A549</b> |       |          |           |  |
| Term                                                 | Count | PValue   | Benjamini |  |
| hsa04931:Insulin resistance                          | 18    | 2.49E-05 | 6.41E-03  |  |
