# Supplementary material for: Cholinergic Receptor Nicotinic Alpha 5 (CHRNA5) RNAi is associated with cell cycle inhibition, apoptosis, DNA damage response and drug sensitivity in breast cancer
Source: PubMed Central journal article supplement (PMC6292578; doi:10.1371/journal.pone.0208982), 2018-12-13
Supplement: pone.0208982.s005.pdf [file pone.0208982.s005.pdf]

**S5 Table. Fold changes of DDR genes in Fig 7 in microarray data and their correlation scores in TCGA and METABRIC.**

| Gene Symbol | Gene ID         | TCGA         |              |             | Metabric     |              |             |
|-------------|-----------------|--------------|--------------|-------------|--------------|--------------|-------------|
|             |                 | r score      | log FC       | p Value     | r score      | log FC       | p Value     |
| APEX1       | ENSG00000100823 | 0.0587451    | 0.103532064  | 0.254852828 | 0.060826831  | 0.103532064  | 0.254852828 |
| ATM         | ENSG00000149311 | -0.013366638 | 0.052742369  | 0.550580148 |              |              |             |
| ATR         | ENSG00000175054 | 0.184065596  | -0.297649961 | 0.006215572 | 0.137416627  | -0.297649961 | 0.006215572 |
| BRCA1       | ENSG00000012048 | 0.057960583  | -1.227567621 | 1.68313E-05 | 0.034661631  | -1.227567621 | 1.68313E-05 |
| BRCA2       | ENSG00000139618 | 0.324952261  | -0.772322573 | 5.68919E-05 | -0.024774271 | -0.772322573 | 5.68919E-05 |
| CCNH        | ENSG00000134480 | -0.325734021 | -0.069545803 | 0.400412521 | -0.154056628 | -0.069545803 | 0.400412521 |
| CDK7        | ENSG00000134058 | -0.161804682 | 0.095047495  | 0.313264612 | -0.141782828 | 0.095047495  | 0.313264612 |
| CHEK1       | ENSG00000149554 | 0.51039426   | -1.045513363 | 7.36251E-06 | 0.516652113  | -1.045513363 | 7.36251E-06 |
| CHEK2       | ENSG00000183765 | 0.336496349  | -0.655084814 | 0.000293493 | 0.358327403  | -0.655084814 | 0.000293493 |
| DDB1        | ENSG00000167986 | 0.092872696  | -0.053981657 | 0.506830608 | 0.189071813  | -0.053981657 | 0.506830608 |
| DUT         | ENSG00000128951 | 0.136583952  | -0.704490198 | 5.94182E-05 | 0.111335597  | -0.704490198 | 5.94182E-05 |
| ERCC1       | ENSG00000012061 | -0.22344735  | 0.311090712  | 0.022085355 | 0.014357655  | 0.311090712  | 0.022085355 |
| ERCC2       | ENSG00000104884 | -0.111993498 | 0.047220623  | 0.666228489 | -0.059368896 | 0.047220623  | 0.666228489 |
| ERCC6       | ENSG00000225830 | 0.038300306  | 0.317522737  | 0.036927959 |              |              |             |
| ERCC8       | ENSG00000049167 | 0.028015231  | -0.296806149 | 0.007204485 |              |              |             |
| EXO1        | ENSG00000174371 | 0.393951091  | -1.055779646 | 0.000274244 | 0.41177178   | -1.055779646 | 0.000274244 |
| FANCC       | ENSG00000158169 | 0.321429004  | -0.505603164 | 0.000568918 | 0.085861533  | -0.505603164 | 0.000568918 |
| FANCD2      | ENSG00000144554 | 0.361227897  | -1.132880491 | 3.64968E-05 | 0.316458768  | -1.132880491 | 3.64968E-05 |
| FANCF       | ENSG00000183161 | -0.018267684 | 0.64173401   | 0.000580434 |              |              |             |
| FANCG       | ENSG00000221829 | 0.23949625   | -1.027954566 | 1.50371E-05 | 0.146611331  | -1.027954566 | 1.50371E-05 |
| H2AFX       | ENSG00000188486 | 0.244992331  | -0.502951538 | 0.00178265  | 0.305201626  | -0.502951538 | 0.00178265  |
| HLTF        | ENSG00000071794 | 0.152801809  | -0.558600892 | 0.0004028   | 0.097146429  | -0.558600892 | 0.0004028   |
| LIG4        | ENSG00000174405 | 0.065247321  | 0.502385023  | 0.001454301 | 0.03525646   | 0.502385023  | 0.001454301 |
| MAD2L2      | ENSG00000116670 | 0.214613023  | -0.737974807 | 0.001020095 | 0.250013361  | -0.737974807 | 0.001020095 |
| MBD4        | ENSG00000129071 | 0.166396715  | -0.238015265 | 0.019475793 |              |              |             |
| MGMT        | ENSG00000170430 | -0.253473033 | -0.187466946 | 0.114461118 | -0.264063372 | -0.187466946 | 0.114461118 |
| MLH1        | ENSG00000076242 | -0.071989668 | -1.345076533 | 4.97846E-06 | -0.051771634 | -1.345076533 | 4.97846E-06 |
| MLH3        | ENSG00000119684 | -0.184014506 | 0.239812887  | 0.038198445 | -0.114373148 | 0.239812887  | 0.038198445 |
| MRE11A      | ENSG00000020922 | 0.222839897  | -0.786664368 | 3.05792E-05 | 0.011403411  | -0.786664368 | 3.05792E-05 |
| MSH2        | ENSG00000095002 | 0.485502405  | -0.611817684 | 0.0001271   | 0.192959904  | -0.611817684 | 0.0001271   |
| MSH3        | ENSG00000113318 | -0.185073183 | -0.332032958 | 0.065029003 | -0.222895377 | -0.332032958 | 0.065029003 |
| MSH6        | ENSG00000116062 | 0.499587279  | -0.716899791 | 5.55811E-05 | 0.300568505  | -0.716899791 | 5.55811E-05 |
| MUS81       | ENSG00000172732 | 0.013019756  | 0.116856228  | 0.185976931 | -0.003748789 | 0.116856228  | 0.185976931 |
| NBN         | ENSG00000104320 | 0.166544095  | -0.208336054 | 0.033138482 | 0.056687584  | -0.208336054 | 0.033138482 |
| NEIL3       | ENSG00000109674 | 0.355468866  | -1.408404221 | 2.76285E-06 | 0.352807319  | -1.408404221 | 2.76285E-06 |
| OGG1        | ENSG00000114026 | -0.062858865 | -0.001251532 | 0.987120824 | 0.107214495  | -0.001251532 | 0.987120824 |
| PARP1       | ENSG00000143799 | 0.163824497  | -0.428683392 | 0.001434718 |              |              |             |
| PCNA        | ENSG00000132646 | 0.357798865  | -0.700492314 | 6.43262E-05 | 0.199545935  | -0.700492314 | 6.43262E-05 |
| POLD1       | ENSG00000062822 | 0.201552847  | -0.871572341 | 6.11758E-05 | 0.22316662   | -0.871572341 | 6.11758E-05 |
| PRKDC       | ENSG00000253729 | 0.332457839  | -0.049474885 | 0.600803014 |              |              |             |
| RAD23B      | ENSG00000119318 | 0.084665772  | 0.16777282   | 0.085779871 | 0.071937243  | 0.16777282   | 0.085779871 |
| RAD50       | ENSG00000113522 | -0.164812324 | 0.427992556  | 0.002329211 |              |              |             |
| RAD51       | ENSG00000051180 | 0.386886535  | -0.495832042 | 0.00142255  | 0.331802787  | -0.495832042 | 0.00142255  |
| RAD52       | ENSG00000002016 | -0.081290859 | -0.063461247 | 0.607844051 |              |              |             |
| RPA2        | ENSG00000117748 | 0.064736852  | -0.642001589 | 0.000144523 | -0.036720914 | -0.642001589 | 0.000144523 |
| RRM2B       | ENSG00000048392 | 0.016976032  | 1.000011155  | 0.000151078 | 0.05413382   | 1.000011155  | 0.000151078 |
| TP53        | ENSG00000141510 | -0.020551438 | -0.246480808 | 0.024849998 |              |              |             |

|         |                 |              |              |             |              |              |             |
|---------|-----------------|--------------|--------------|-------------|--------------|--------------|-------------|
| TP53BP1 | ENSG00000067369 | -0.133135905 | -0.18472387  | 0.048027543 | -0.156315577 | -0.18472387  | 0.048027543 |
| WRN     | ENSG00000165392 | 0.108390358  | -0.218201635 | 0.033282267 | 0.009233785  | -0.218201635 | 0.033282267 |
| XPA     | ENSG00000136936 | -0.377699998 | 0.336911743  | 0.013571621 | -0.079811444 | 0.336911743  | 0.013571621 |
| XPC     | ENSG00000154767 | -0.329075827 | 0.875034147  | 1.95921E-05 | -0.293896093 | 0.875034147  | 1.95921E-05 |
| XRCC1   | ENSG00000073050 | -0.168781058 | -0.081621975 | 0.335502339 | -0.13020509  | -0.081621975 | 0.335502339 |
| XRCC3   | ENSG00000126215 | 0.114802393  | -0.413969088 | 0.005088717 | 0.164741377  | -0.413969088 | 0.005088717 |
| XRCC4   | ENSG00000152422 | 0.020962873  | -0.600134983 | 0.000223004 |              |              |             |
| XRCC5   | ENSG00000079246 | 0.178396517  | -0.364894565 | 0.005471218 | 0.108148952  | -0.364894565 | 0.005471218 |
| XRCC6   | ENSG00000196419 | 0.27434471   | -0.479711109 | 0.000980726 | 0.188782783  | -0.479711109 | 0.000980726 |
